# Supplementary material
Source: PubMed Central journal article supplement (PMC10070330)
Supplement: 41467_2023_37556_MOESM1_ESM.pdf [file 41467_2023_37556_MOESM1_ESM.pdf]

Supplementary Figure. Sample size calculation

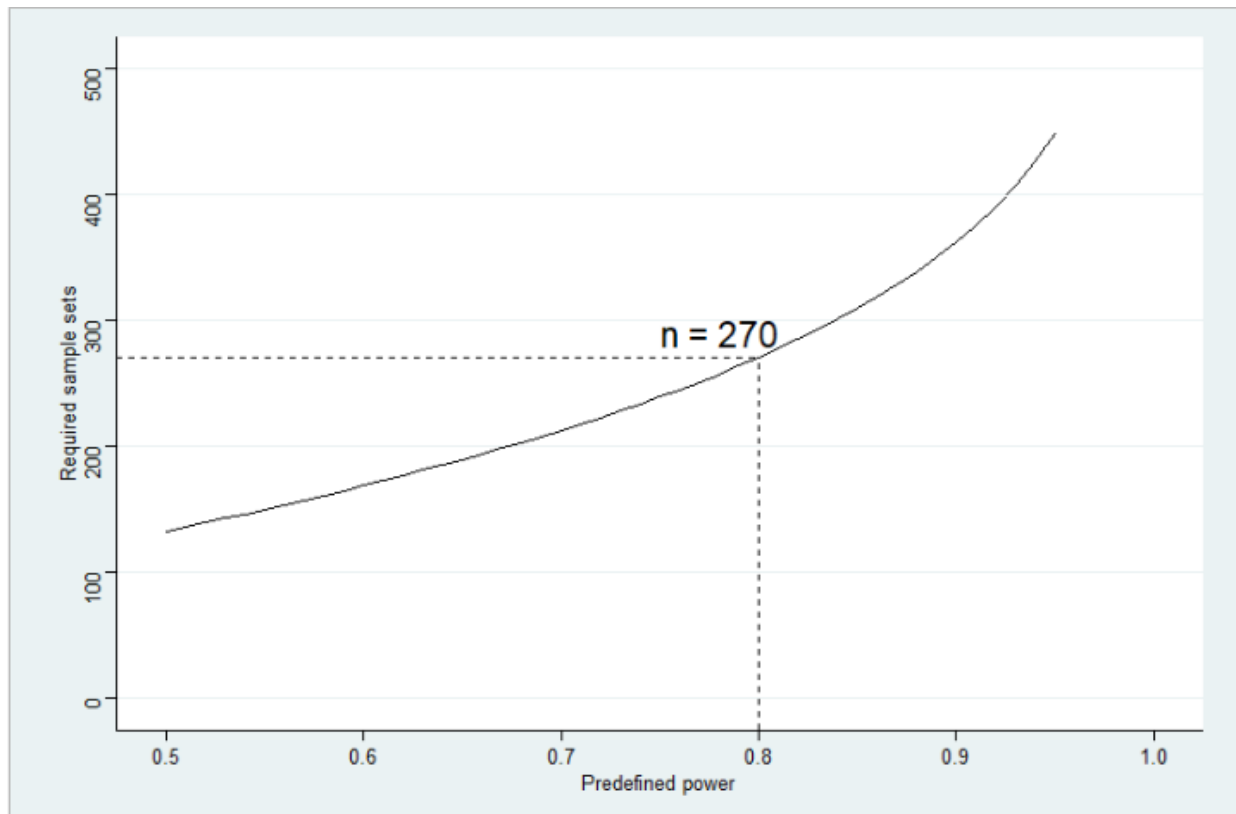

Our preliminary result showed that the adjusted odds ratio for effectiveness after the second dose BNT162b2 for adolescents was 0.68. Given that the prevalence of the extended dose was 55% of the Hong Kong population aged less than 18 years old, matched sets (1 case and 4 controls) ranging from 133 to 448 were required to achieve 60% to 95% power to detect the odds ratios of 0.68 at 0.05 significance level. With a power of 80%, the required sample sets are 270 (270 cases and 1080 controls). The line indicates the required sample sets plotted for power from 0.50 to 0.95 by 0.05. The sample size calculation was conducted using the R package “powerSurvEpi”.

Supplementary Table 1. Characteristics in two case-control studies for Covid-19 infection and Covid-19 hospitalization stratified by case and exposure status

|                                                                    | Covid-19 infection                   |                                      |        |                                     |                                      |        |
|--------------------------------------------------------------------|--------------------------------------|--------------------------------------|--------|-------------------------------------|--------------------------------------|--------|
|                                                                    | Controls                             |                                      |        | Cases                               |                                      |        |
|                                                                    | Regular dosing interval<br>N = 16059 | Extended dosing interval<br>N = 5518 | SMD    | Regular dosing interval<br>N = 4148 | Extended dosing interval<br>N = 1248 | SMD    |
| Onset time [days, median (25-75 percentile)]                       | 201.00 [183.00, 219.00]              | 51.00 [19.00, 106.00]                | 2.562  | 198.00 [180.00, 215.00]             | 67.50 [26.00, 118.00]                | 2.404  |
| Age [mean (SD)]                                                    | 15.40 (1.27)                         | 14.09 (2.52)                         | 0.656  | 15.38 (1.28)                        | 14.00 (2.61)                         | 0.670  |
| Sex (male ,%)                                                      | 8602 (53.6)                          | 2982 (54.0)                          | 0.010  | 2194 (52.9)                         | 703 (56.3)                           | 0.069  |
| Pre-existing comorbidities (%)                                     |                                      |                                      |        |                                     |                                      |        |
| Asthma                                                             | 183 (1.1)                            | 75 (1.4)                             | 0.020  | 73 (1.8)                            | 23 (1.8)                             | 0.006  |
| Diabetes                                                           | 22 (0.1)                             | 13 (0.2)                             | 0.023  | 6 (0.1)                             | 2 (0.2)                              | 0.004  |
| Epilepsy                                                           | 97 (0.6)                             | 63 (1.1)                             | 0.058  | 37 (0.9)                            | 18 (1.4)                             | 0.051  |
| The use of immunosuppressants within 90 days before index date (%) | 5 (0.0)                              | 14 (0.3)                             | 0.059  | 0 (0.0)                             | 3 (0.2)                              | 0.069  |
|                                                                    | Covid-19 hospitalization             |                                      |        |                                     |                                      |        |
|                                                                    | Controls                             |                                      |        | Cases                               |                                      |        |
|                                                                    | Regular dosing interval<br>N = 520   | Extended dosing interval<br>N = 288  | SMD    | Regular dosing interval<br>N = 133  | Extended dosing interval<br>N = 69   | SMD    |
| Onset time [days, median (25-75 percentile)]                       | 186.00 [163.00, 212.50]              | 71.00 [34.75, 111.50]                | 2.093  | 188.00 [165.00, 207.00]             | 88.00 [57.00, 112.00]                | 2.304  |
| Age [mean (SD)]                                                    | 15.41 (1.30)                         | 13.38 (2.92)                         | 0.901  | 15.35 (1.33)                        | 13.42 (3.02)                         | 0.825  |
| Sex (male ,%)                                                      | 265 (51.0)                           | 155 (53.8)                           | 0.057  | 67 (50.4)                           | 38 (55.1)                            | 0.094  |
| Pre-existing comorbidities (%)                                     |                                      |                                      |        |                                     |                                      |        |
| Asthma                                                             | 9 (1.7)                              | 2 (0.7)                              | 0.095  | 5 (3.8)                             | 0 (0.0)                              | 0.280  |
| Diabetes                                                           | 1 (0.2)                              | 0 (0.0)                              | 0.062  | 0 (0.0)                             | 0 (0.0)                              | <0.001 |
| Epilepsy                                                           | 8 (1.5)                              | 5 (1.7)                              | 0.016  | 7 (5.3)                             | 3 (4.3)                              | 0.043  |
| The use of immunosuppressants within 90 days before index date (%) | 0 (0.0)                              | 0 (0.0)                              | <0.001 | 0 (0.0)                             | 2 (2.9)                              | 0.244  |

Abbreviation: standard mean difference (SMD), Standard Deviation (SD)

*Supplementary Table 2. The number of participants in each age strata after matching*

| Age | Covid-19 infection |       | Covid-19 related hospitalization |       |
|-----|--------------------|-------|----------------------------------|-------|
|     | Control            | Cases | Control                          | Cases |
| 3   | 0                  | 0     | 0                                | 0     |
| 4   | 0                  | 0     | 0                                | 0     |
| 5   | 20                 | 5     | 4                                | 1     |
| 6   | 73                 | 19    | 4                                | 1     |
| 7   | 104                | 26    | 8                                | 2     |
| 8   | 77                 | 20    | 16                               | 4     |
| 9   | 124                | 31    | 4                                | 1     |
| 10  | 144                | 36    | 8                                | 2     |
| 11  | 148                | 37    | 16                               | 4     |
| 12  | 219                | 55    | 16                               | 4     |
| 13  | 2032               | 508   | 92                               | 23    |
| 14  | 4340               | 1085  | 148                              | 37    |
| 15  | 4560               | 1140  | 172                              | 43    |
| 16  | 4708               | 1177  | 132                              | 33    |
| 17  | 5028               | 1257  | 188                              | 47    |
| Sum | 21577              | 5396  | 808                              | 202   |
